# Supplementary material for: Effects of bond character on the electronic structure of brownmillerite-phase oxides, Ca2B′xFe2−xO5 (B′ = Al, Ga): an X-ray absorption and electron energy loss spectroscopic study
Source: Royal Society of Chemistry journal article supplement (doi:10.1039/b914983j), 2009-01-01
Supplement: b914983j.pdf [file b914983j.pdf]

## Supplementary Data

### Effects of bond-character on the electronic structure of Brownmillerite-phase oxides, $\text{Ca}_2\text{B}'_x\text{Fe}_{2-x}\text{O}_5$ ( $\text{B}' = \text{Al}, \text{Ga}$ ); an X-ray absorption and electron energy loss spectroscopic study

Andrew P. Grosvenor,<sup>a,b,\*</sup> Farshid Ramezanipour,<sup>a,b</sup> Shahab Derakhshan,<sup>a,b</sup> Christian Maunders,<sup>c</sup> Gianluigi A. Botton,<sup>c,d</sup> and John E. Greedan<sup>a,b</sup>

<sup>a</sup>Department of Chemistry, <sup>b</sup>Brockhouse Institute for Materials Research, <sup>c</sup>Canadian Centre for Electron Microscopy, and <sup>d</sup>Department of Materials Science and Engineering, McMaster University, Hamilton, Ontario L8S 4M1 Canada

*\*Corresponding Author.*

*Fax: 1-306-966-4730*

*E-mail Address: [andrew.grosvenor@usask.ca](mailto:andrew.grosvenor@usask.ca)*

*Current Address: Department of Chemistry, University of Saskatchewan, Saskatoon, Saskatchewan S7N 5C9 Canada*

**Table S1.** Lattice constants and space-groups of the different  $\text{Ca}_2\text{Fe}_2\text{O}_5$ ,  $\text{Ca}_2\text{Al}_x\text{Fe}_{2-x}\text{O}_5$ , and  $\text{Ca}_2\text{Ga}_x\text{Fe}_{2-x}\text{O}_5$  samples examined by XANES and EELS.

| Material                                              | Space-group <sup>a</sup> | <i>a</i> (Å) | <i>b</i> (Å) | <i>c</i> (Å) |
|-------------------------------------------------------|--------------------------|--------------|--------------|--------------|
| $\text{Ca}_2\text{Fe}_2\text{O}_5$                    | Pnma                     | 5.425(1)     | 14.750(4)    | 5.593(2)     |
| $\text{Ca}_2\text{Al}_{0.2}\text{Fe}_{1.8}\text{O}_5$ | Pnma                     | 5.412(2)     | 14.702(4)    | 5.593(2)     |
| $\text{Ca}_2\text{Al}_{0.4}\text{Fe}_{1.6}\text{O}_5$ | Ibm2                     | 5.3931(7)    | 14.636(2)    | 5.5918(7)    |
| $\text{Ca}_2\text{Al}_{0.8}\text{Fe}_{1.2}\text{O}_5$ | Ibm2                     | 5.365(2)     | 14.551(3)    | 5.578(2)     |
| $\text{Ca}_2\text{AlFeO}_5$                           | Ibm2                     | 5.345(1)     | 14.508(2)    | 5.562(2)     |
| $\text{Ca}_2\text{Ga}_{0.5}\text{Fe}_{1.5}\text{O}_5$ | Pnma                     | 5.4095(6)    | 14.721(2)    | 5.601(1)     |
| $\text{Ca}_2\text{GaFeO}_5$                           | Pnma                     | 5.394(2)     | 14.696(4)    | 5.599(2)     |
| $\text{Ca}_2\text{Ga}_{1.5}\text{Fe}_{0.5}\text{O}_5$ | Pnma                     | 5.3727(8)    | 14.676(2)    | 5.5860(8)    |

<sup>a</sup>The change in space-group from Pnma to I2mb with *x* in  $\text{Ca}_2\text{Al}_x\text{Fe}_{2-x}\text{O}_5$  was observed to occur at a slightly lower, although similar, value than that reported previously (*x* = 0.47).<sup>30</sup> The change in space-group from Pnma to I2mb is easily identified owing to the presence of (131) and (151) reflections in powder patterns from the former but not the later.<sup>30</sup>
